# Supplementary material for: Stabilized Fe3O4 magnetic nanoparticles into nanopores of modified montmorillonite clay: a highly efficient catalyst for the Baeyer–Villiger oxidation under solvent free conditions
Source: Royal Society of Chemistry journal article supplement (doi:10.1039/c5gc02668g), 2016-01-01
Supplement: c5gc02668g1.pdf [file c5gc02668g1.pdf]

## Stabilized Fe<sub>3</sub>O<sub>4</sub> magnetic nanoparticles into nanopores of modified montmorillonite clay: A highly efficient catalyst for Baeyer-Villiger oxidation under solvent free condition

Pallab Kumar Saikia, Podma Pollov Sarmah, Bibek Jyoti Borah, Lakshi Saikia, Kokil Saikia, Dipak Kumar Dutta\*

Materials Science Division, CSIR-North East Institute of Science and Technology, Jorhat 785006, Assam, India, Fax: (+)91 376 2370011, E-mail: dutta\_dk@rrljorhat.res.in

### Supplementary Information

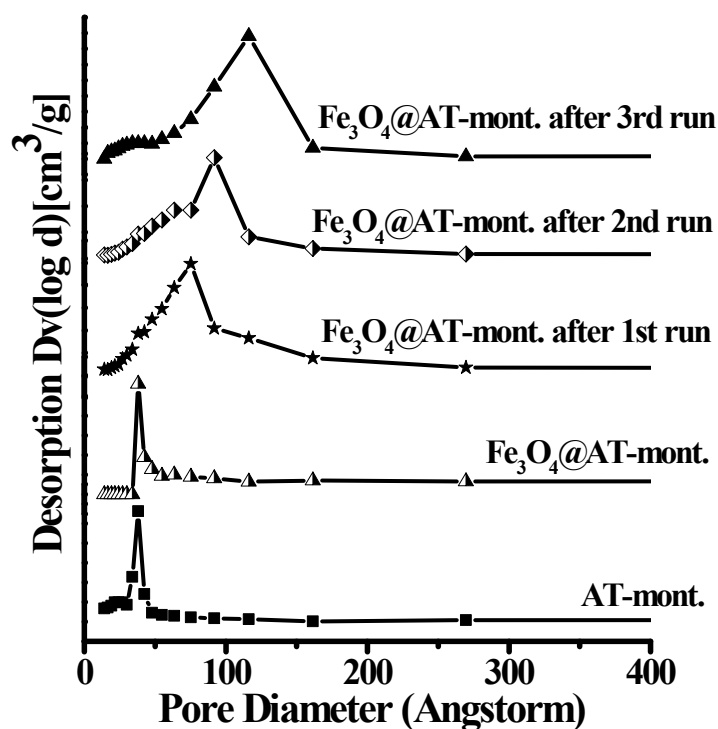

ESI Fig. 1: BJH pore size distribution of AT-mont., Fe<sub>3</sub>O<sub>4</sub>@AT-mont. and recovered catalyst after 1<sup>st</sup>, 2<sup>nd</sup> and 3<sup>rd</sup> run.

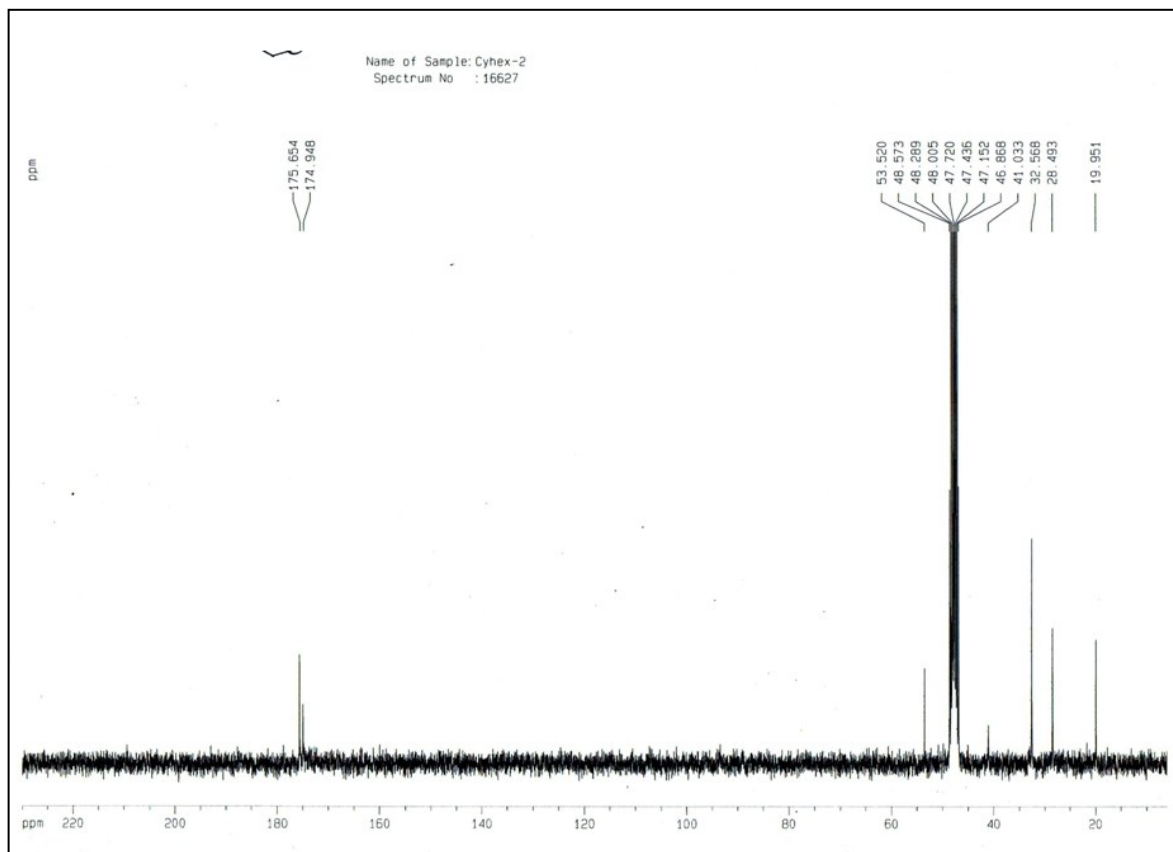

**ESI Fig. 2:**  $^{13}\text{C}$  NMR spectra of  $\epsilon$ - caprolactone for the product of Cyclohex-2-en-1-one (spectra recorded using Duetrated methanol as solvent)

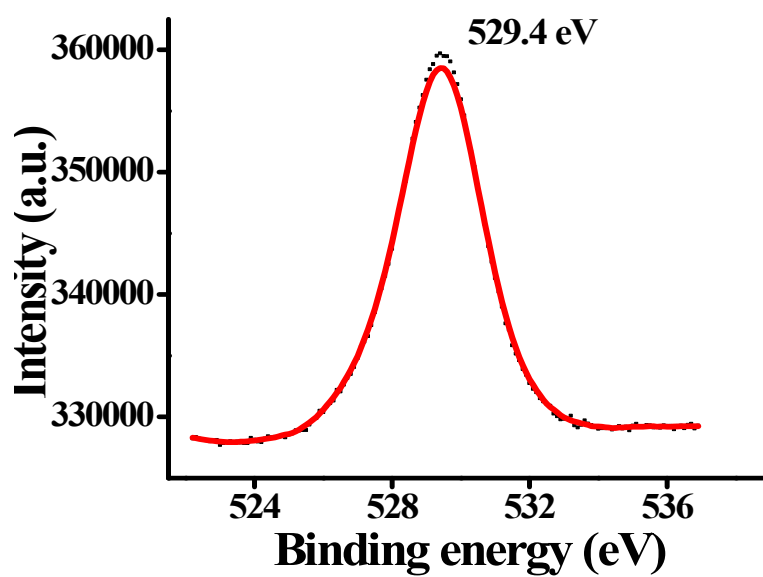

**ESI Fig. 3:** XPS spectra of the O 1S of the  $\text{Fe}_3\text{O}_4@AT\text{-mont.}$
